# Supplementary material for: Synthesis and characterization of a Bi10O8(OAr)16 oxo-cluster supported by p-tert-butylcalix[5]arene ligands
Source: Royal Society of Chemistry journal article supplement (doi:10.1039/c6dt02068b), 2016-01-01
Supplement: c6dt02068b1.pdf [file c6dt02068b1.pdf]

# Synthesis and Characterization of a $\text{Bi}_{10}\text{O}_8(\text{OAr})_{16}$ oxo-Cluster Supported by *p*-*tert*-Butylcalix[5]arene ligands

Daniel Mendoza-Espinosa\*

Departamento de Ciencias Básicas, Universidad Autónoma Metropolitana-Azcapotzalco, Avenida San Pablo No. 180, Ciudad de México 02200, México.

## Supporting information

### Contents:

|                                                                                                            |    |
|------------------------------------------------------------------------------------------------------------|----|
| 1) $^1\text{H}$ NMR spectrum of cluster <b>2</b> .....                                                     | S2 |
| 2) FT-IR spectrum of complex <b>2</b> .....                                                                | S4 |
| 3) TGA graphic and data for complex <b>2</b> .....                                                         | S3 |
| 4) Supplementary Structural Figures.....                                                                   | S3 |
| 5) $^1\text{H}$ NMR Spectrum of complex $\text{Bi}\{\text{}^t\text{BuC5}(\text{OH})_2\}$ .....             | S6 |
| 6) $^1\text{H}$ NMR spectrum of complex $\text{Bi}_4\text{O}_2\{\text{}^t\text{BuC5}(\text{OH})_2\}$ ..... | S7 |

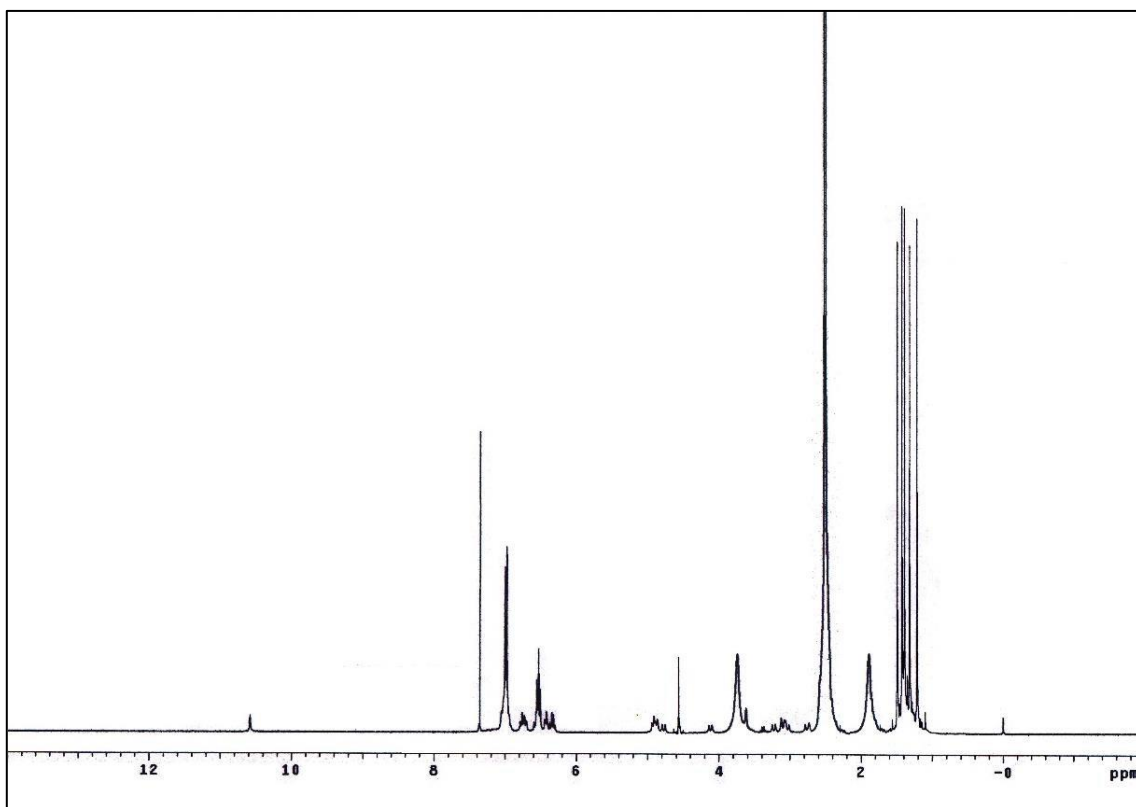

**Figure S1.** Overnight acquired  $^1\text{H}$  NMR spectrum in  $\text{DMSO-d}_6$  of cluster **2**.

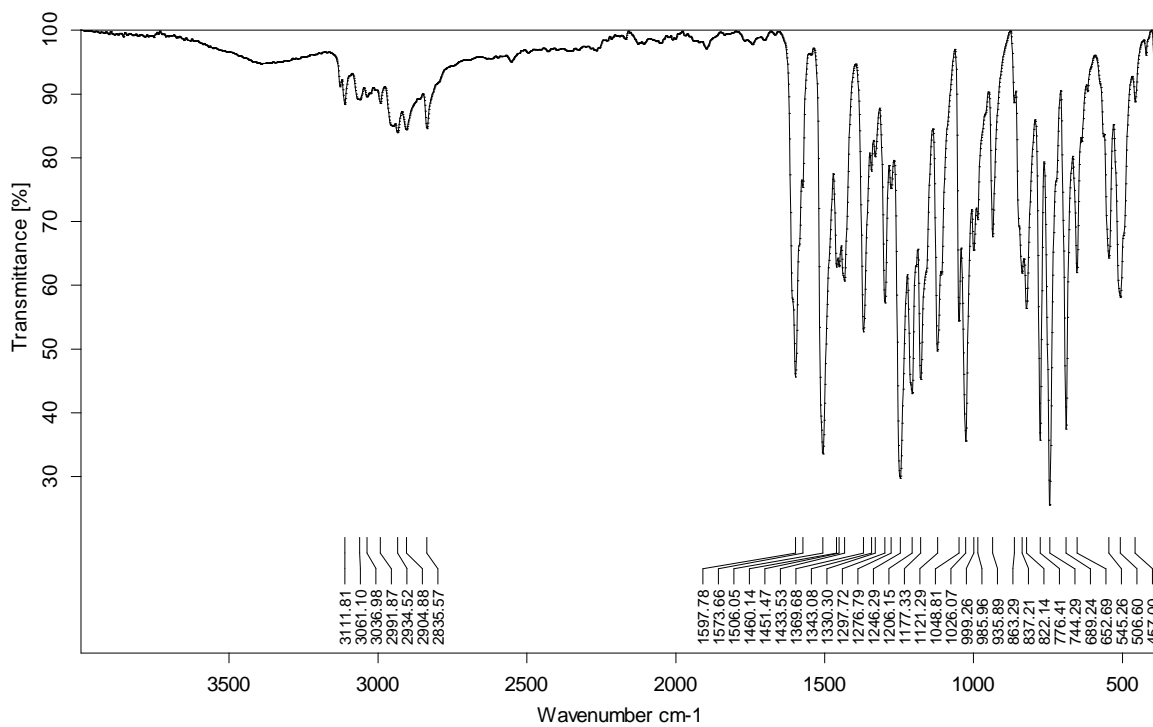

**Figure S2.** FT-IR in KBr of cluster **2**

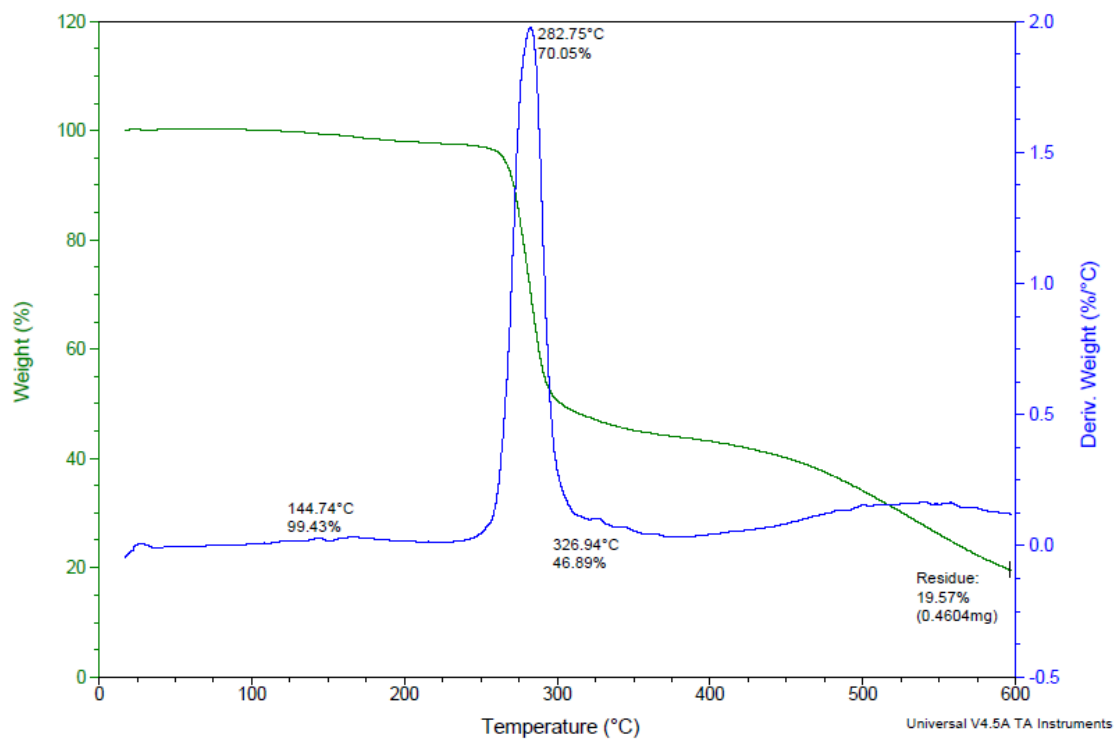

**Figure S3.** TGA data for bismuth cluster 2

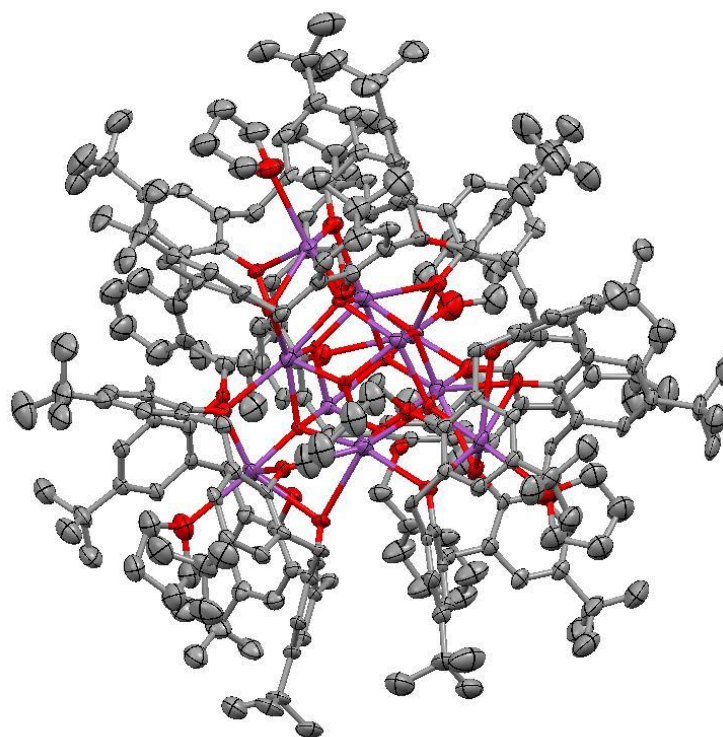

**Figure S4.** Molecular structure of complex 2 with thermal ellipsoids shown at 50%. Hydrogen atoms have been omitted for clarity.

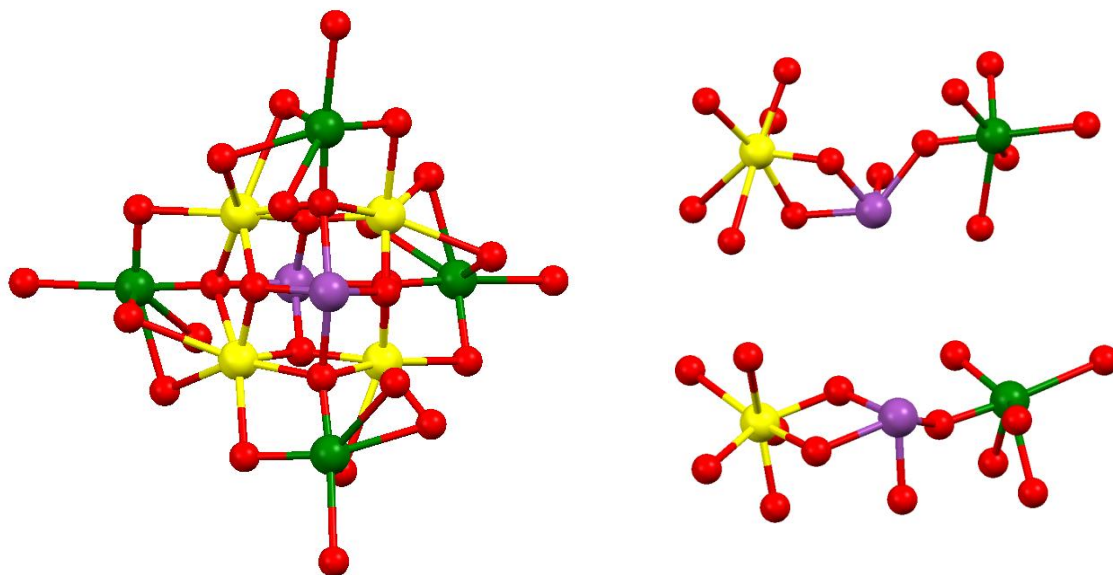

**Figure S5.** Ball and stick representation of the  $\text{Bi}_{10}\text{O}_8(\text{OAr})_{16}$  central cluster in complex **2**. Coordination number (CN) around the bismuth centers is highlighted by color label. Yellow: CN = 7, green: CN = 6 and purple: CN = 4.

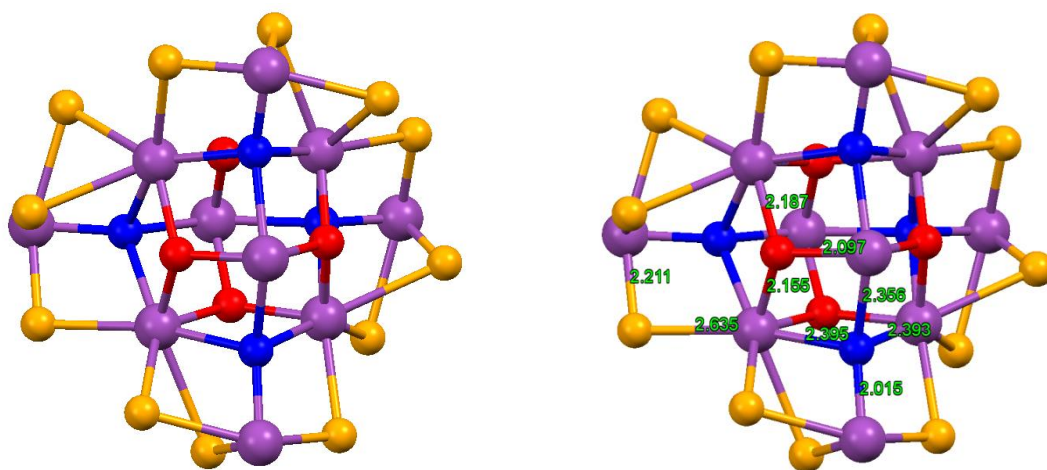

**Figure S6.** Ball and stick representation of the  $\text{Bi}_{10}\text{O}_8(\text{OAr})_{16}$  cluster in complex **2**. Oxygen atoms bridging type ( $\mu$ ) is highlighted by color label. Yellow:  $\mu = 2$ , red:  $\mu = 3$ , blue:  $\mu = 4$ . Selected Bi-O bond distances of are displayed in green.

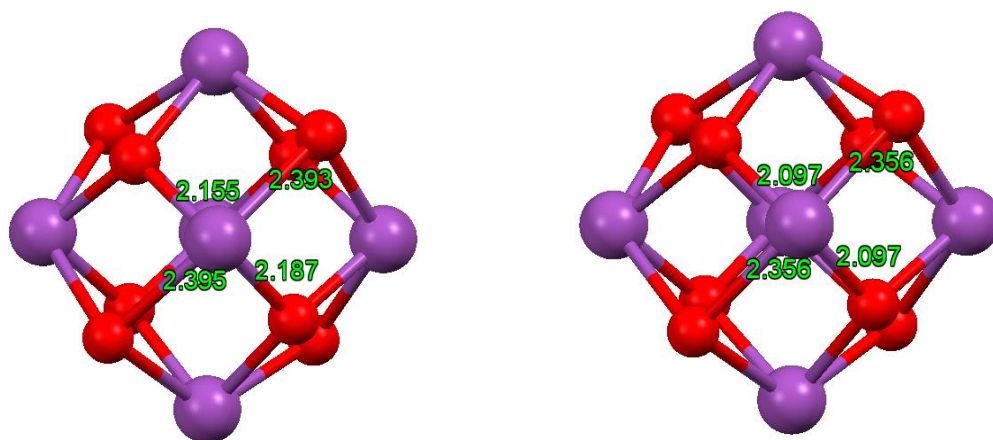

**Figure S7.** Ball and stick representation of the  $\text{Bi}_6\text{O}_8$  core cluster in complex **2**. Selected Bi-O bond distances of are displayed in green.

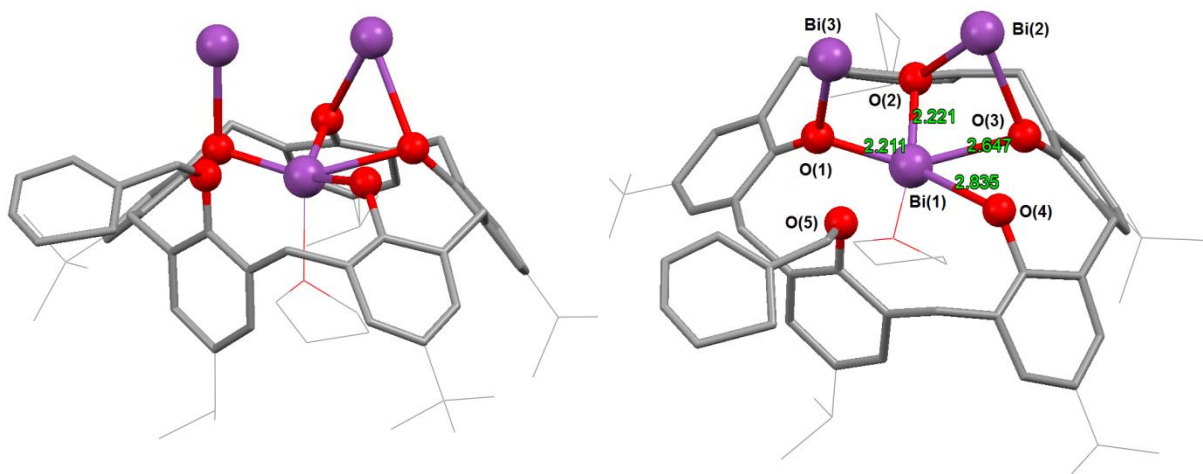

**Figure S8.** Ball and stick representation of one  $[\text{tBuC}_5(\text{Bn})(\text{H})]$  ligand in complex **2** displaying the flattened cone conformation. Selected Bi-OAr bond distances are displayed on green.

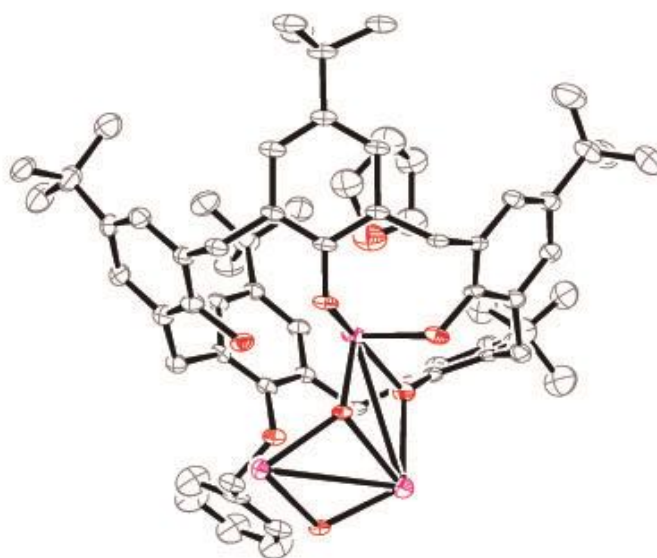

**Figure S9.** ORTEP representation of the asymmetric unit of **2** displaying ADPs

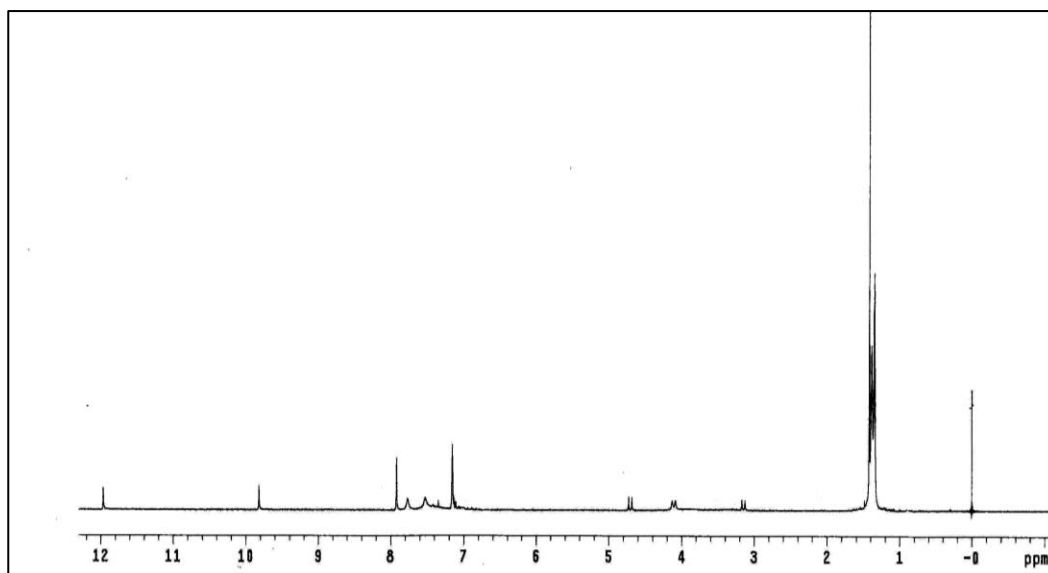

**Figure S10.**  $^1\text{H}$  NMR in  $\text{C}_6\text{D}_6$  of complex  $\text{Bi}\{\text{tBuC}_5(\text{OH})_2\}$

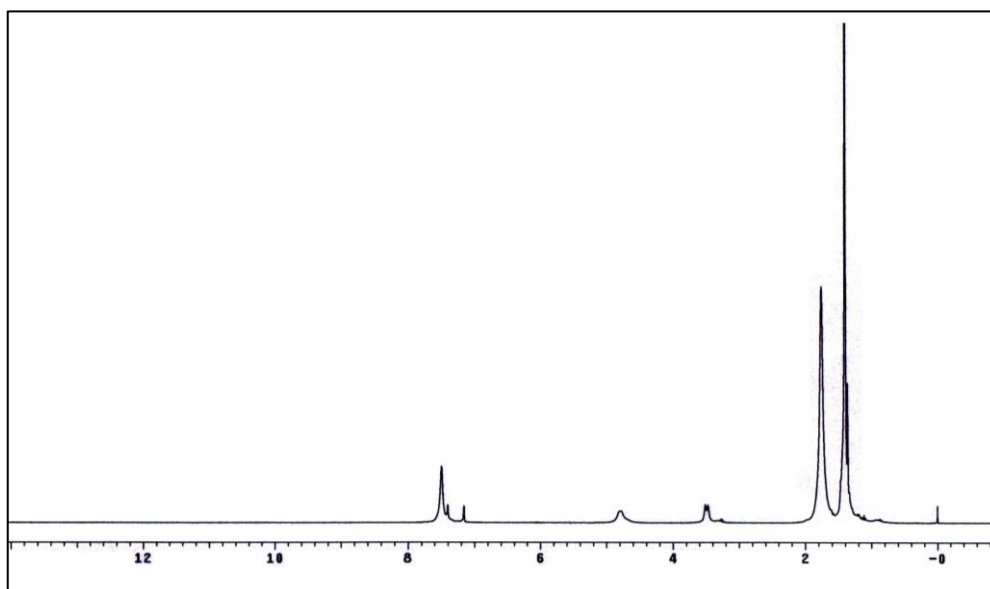

**Figure S11.**  $^1\text{H}$  NMR in  $\text{C}_6\text{D}_6$  of complex  $\text{Bi}_4\text{O}_2\{\text{tBuC}_5(\text{OH})\}$
